# Supplementary material for: Lactobacillus plantarum ameliorates NASH-related inflammation by upregulating l-arginine production
Source: PubMed Central journal article supplement (PMC10689779; doi:10.1038/s12276-023-01102-0), 2023-11-01
Supplement: 12276_2023_1102_MOESM1_ESM.pdf [file 12276_2023_1102_MOESM1_ESM.pdf]

## SUPPLEMENTARY INFORMATION

### ***Lactobacillus plantarum* ameliorates NASH-related inflammation by upregulating L-arginine production**

**Dong Yun Kim<sup>1,2,3</sup>, Jun Yong Park<sup>2,3</sup>, and Heon Yung Gee<sup>1,4,5</sup>**

<sup>1</sup> Department of Pharmacology, Yonsei University College of Medicine, Seoul, Republic of South Korea

<sup>2</sup> Division of Gastroenterology, Department of Internal Medicine, Yonsei University College of Medicine, Seoul, Republic of South Korea

<sup>3</sup> Yonsei Liver Center, Severance Hospital, Seoul, Republic of South Korea

<sup>4</sup> Graduate School of Medical Science, Brain Korea 21 Project, Yonsei University College of Medicine, Seoul, Republic of South Korea

<sup>5</sup> Woo Choo Lee Institute for Precision Drug Development

## SUPPLEMENTARY FIGURES

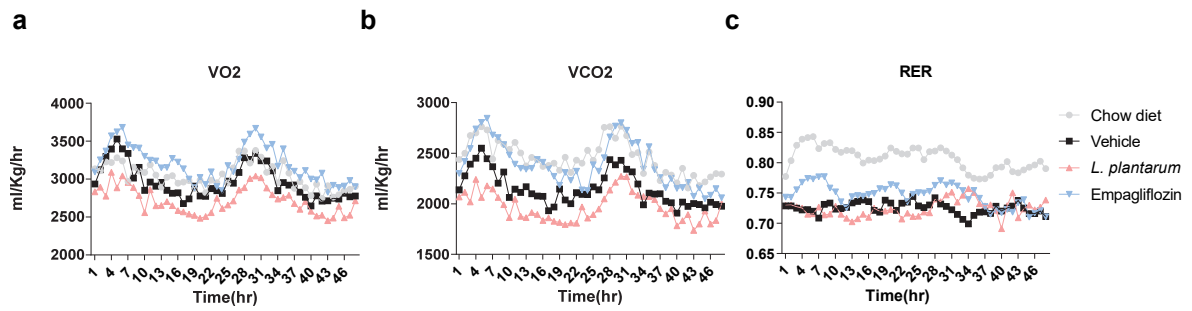

**Supplementary Fig. 1. Energy homeostasis during treatment.**

(a) Oxygen consumption rate (VO<sub>2</sub>), (b) carbon dioxide release rate (VCO<sub>2</sub>), (c) respiratory exchange ratio measured using a metabolic cage after treatment (n = 3–4 per group).

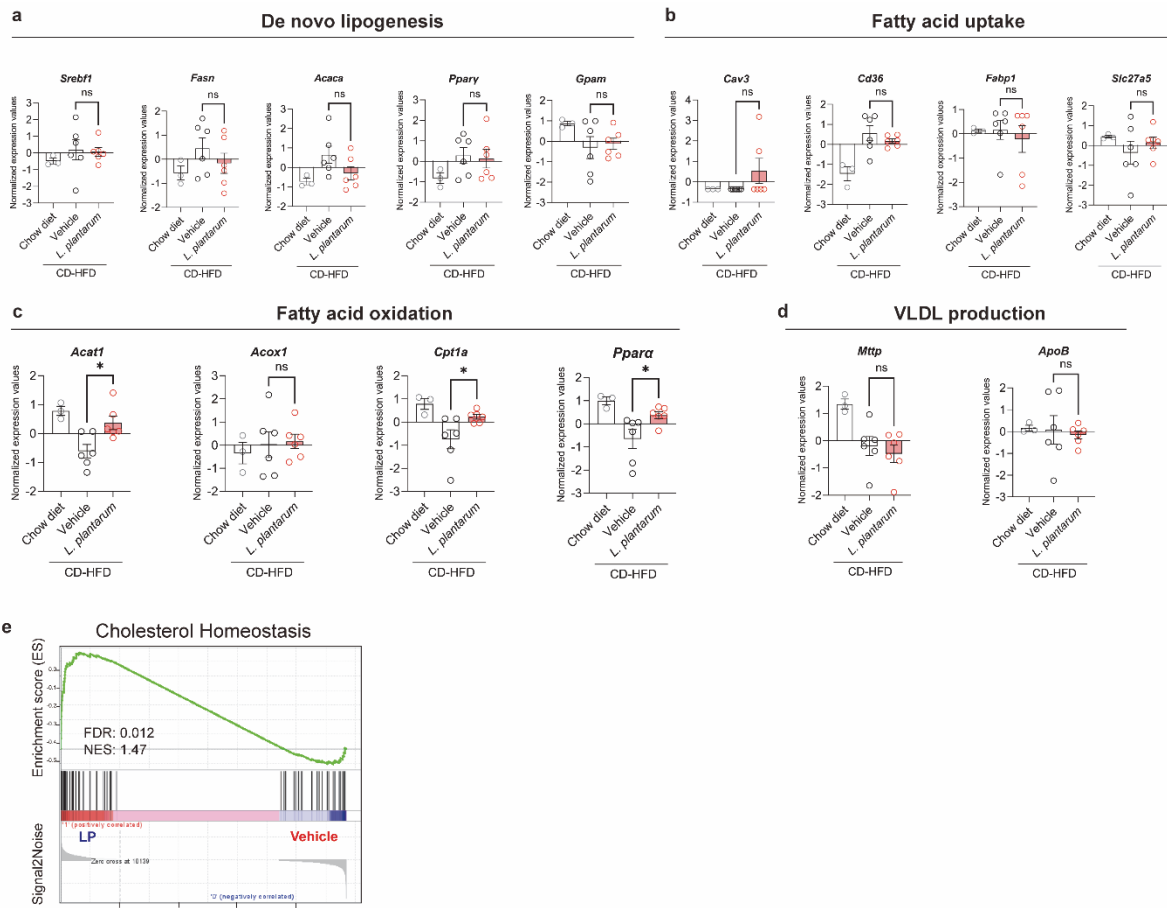

## Supplementary Fig. 2. *L. plantarum* treatment regulates hepatic lipid metabolism.

(a-d) mRNA levels of genes implicated in lipid metabolism in the liver, as measured by real-time (RT)-PCR; de novo lipogenesis (a), fatty acid uptake (b), fatty acid oxidation (c) and VLDL generation (d). (e) Enrichment plot for lipid metabolism of the transcriptome data in the *L. plantarum* group relative to the vehicle group. Data are expressed as mean  $\pm$  SD. \* $P < 0.05$  compared to the vehicle-treated group, using the post-hoc pairwise Mann-Whitney U tests after Kruskal-Wallis test with Bonferroni correction. VLDL, very low-density lipoprotein.

a

Top 10 pathway enrichment in KEGG pathway  
between *L. plantarum*-treated NASH vs. vehicle-treated NASH

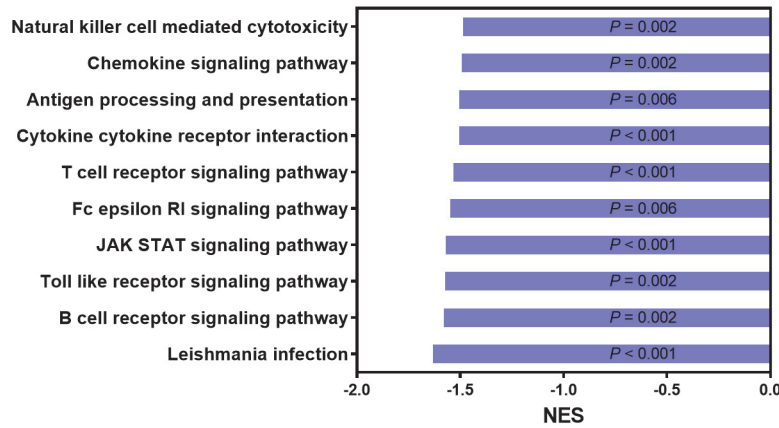

b

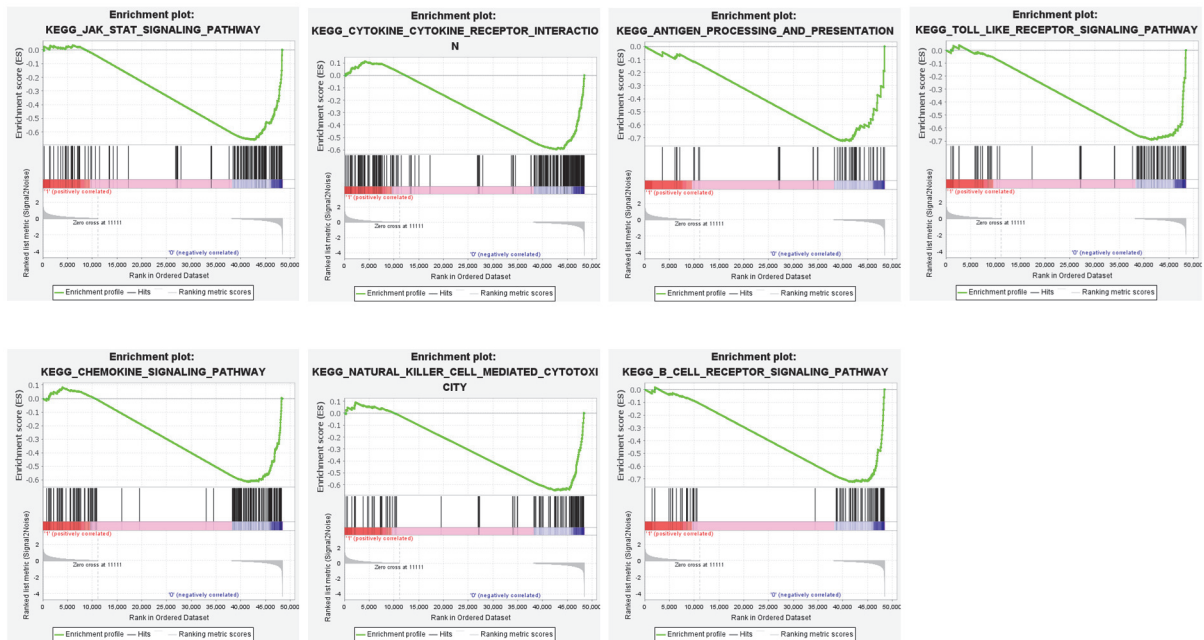

Supplementary Fig. 3. KEGG pathway enrichment analysis results of the transcriptome data in the *L. plantarum* treatment group.

(a) Top 10 enriched pathways of the transcriptome data in the *L. plantarum* treatment group compared with the vehicle group. (b) Enrichment plot for inflammation-related seven terms.

**a**

**DNA Paired end reads**

|            | Raw        | Trim       | mouse_C57BL_6NJ |
|------------|------------|------------|-----------------|
| Chow diet1 | 42,701,488 | 33,089,770 | 32,277,464      |
| Chow diet2 | 38,434,691 | 29,547,908 | 28,557,021      |
| Chow diet3 | 42,889,238 | 32,832,987 | 32,396,373      |
| Chow diet4 | 40,790,788 | 31,442,747 | 29,735,225      |
| Chow diet5 | 36,420,531 | 27,993,824 | 27,025,363      |
| Vehicle1   | 38,892,088 | 29,331,966 | 19,174,193      |
| Vehicle2   | 39,867,383 | 30,505,097 | 10,712,920      |
| Vehicle3   | 41,975,933 | 32,997,000 | 29,012,758      |
| Vehicle4   | 41,994,103 | 37,131,260 | 33,303,885      |
| LP1        | 41,234,664 | 36,518,788 | 28,312,811      |
| LP2        | 38,858,437 | 34,286,349 | 31,014,413      |
| LP3        | 39,001,090 | 34,020,003 | 0,307,339       |
| LP4        | 39,753,680 | 34,619,213 | 20,355,131      |
| LP5        | 42,455,157 | 37,712,656 | 2,070,638       |

**b**

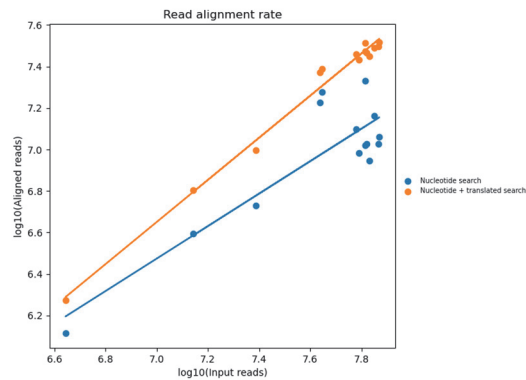

**c**

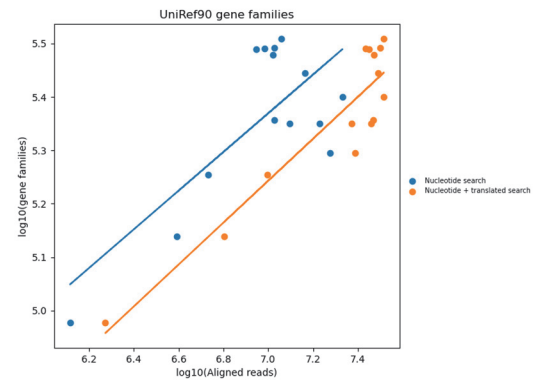

**Supplementary Fig. 4. Quality control for metagenomic shotgun analysis.**

(a) The number of reads filtered at each QC step. Summary read values of metagenomic data after filtering. (b) Map reads to alignment rate. (c) Align reads to a UniRef90 database.

Abbreviation: LP, *Lactobacillus plantarum*.

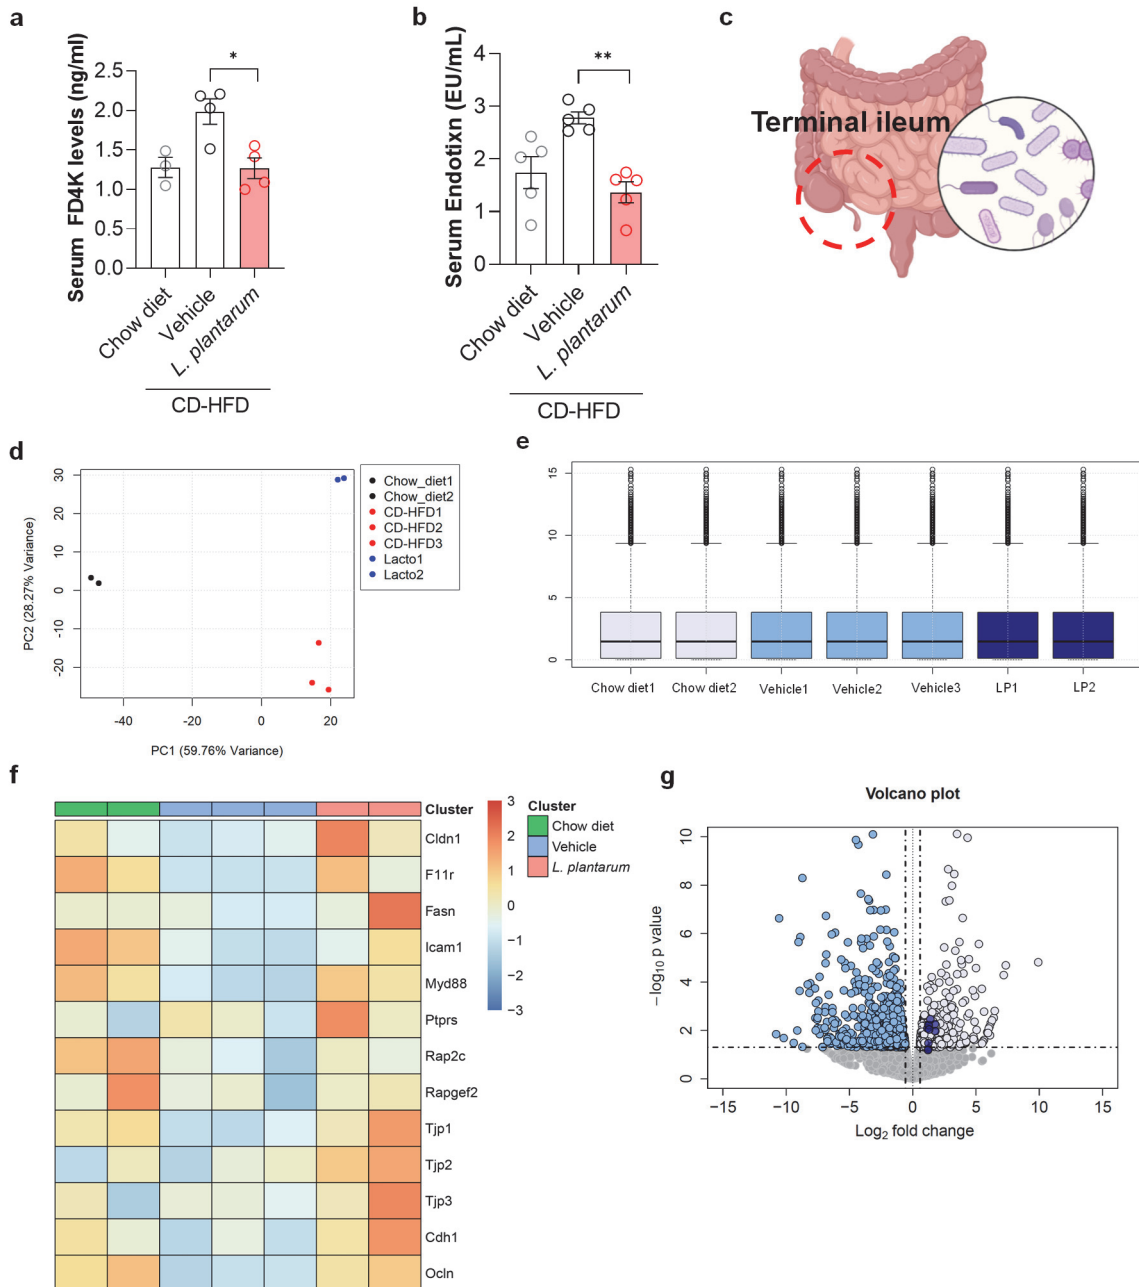

**Supplementary Fig. 5. Improved intestinal permeability and transcriptomic changes of *L. plantarum* treatment in intestinal tissues.** (a) Serum concentrations of FD4K 4 h after feeding with FD4K by gavage. (b) Serum endotoxin levels. (c) The terminal ileum was utilized to see the transcriptomic changes induced by *L. plantarum* treatment. (d) Principal component analysis plot. (e) Box plot for normalized counts. (f) Heatmap representation of 13 genes belonging to the “establishment of endothelial intestinal barrier” (GO:0090557). (g) Volcano plot depicting overall gene expression change of *L. plantarum* group compared with vehicle

mice. Intestinal barrier function-related genes in (f) were marked in deep blue dots. \* $P < 0.05$ , \*\*  $P < 0.01$  compared with the vehicle-treated mice.

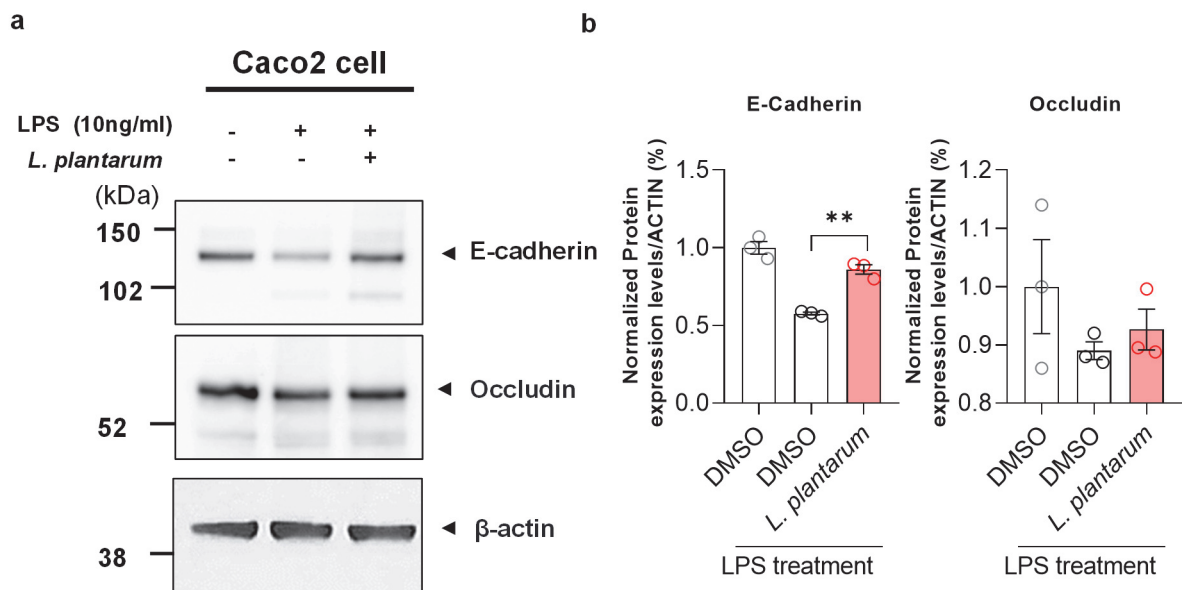

**Supplementary Fig. 6. Tight junction protein levels in Caco-2 cells.** (a) Representative immunoblot analyses of E-cadherin and occludin. (b) Bar graphs represent band intensities of the blot. Data is the mean  $\pm$  SD of more than three independent experiments. Band intensities were normalized to  $\beta$ -actin. \*\*  $P < 0.01$ . Data points were logarithmically transformed to obtain normality before testing. LPS, lipopolysaccharide.



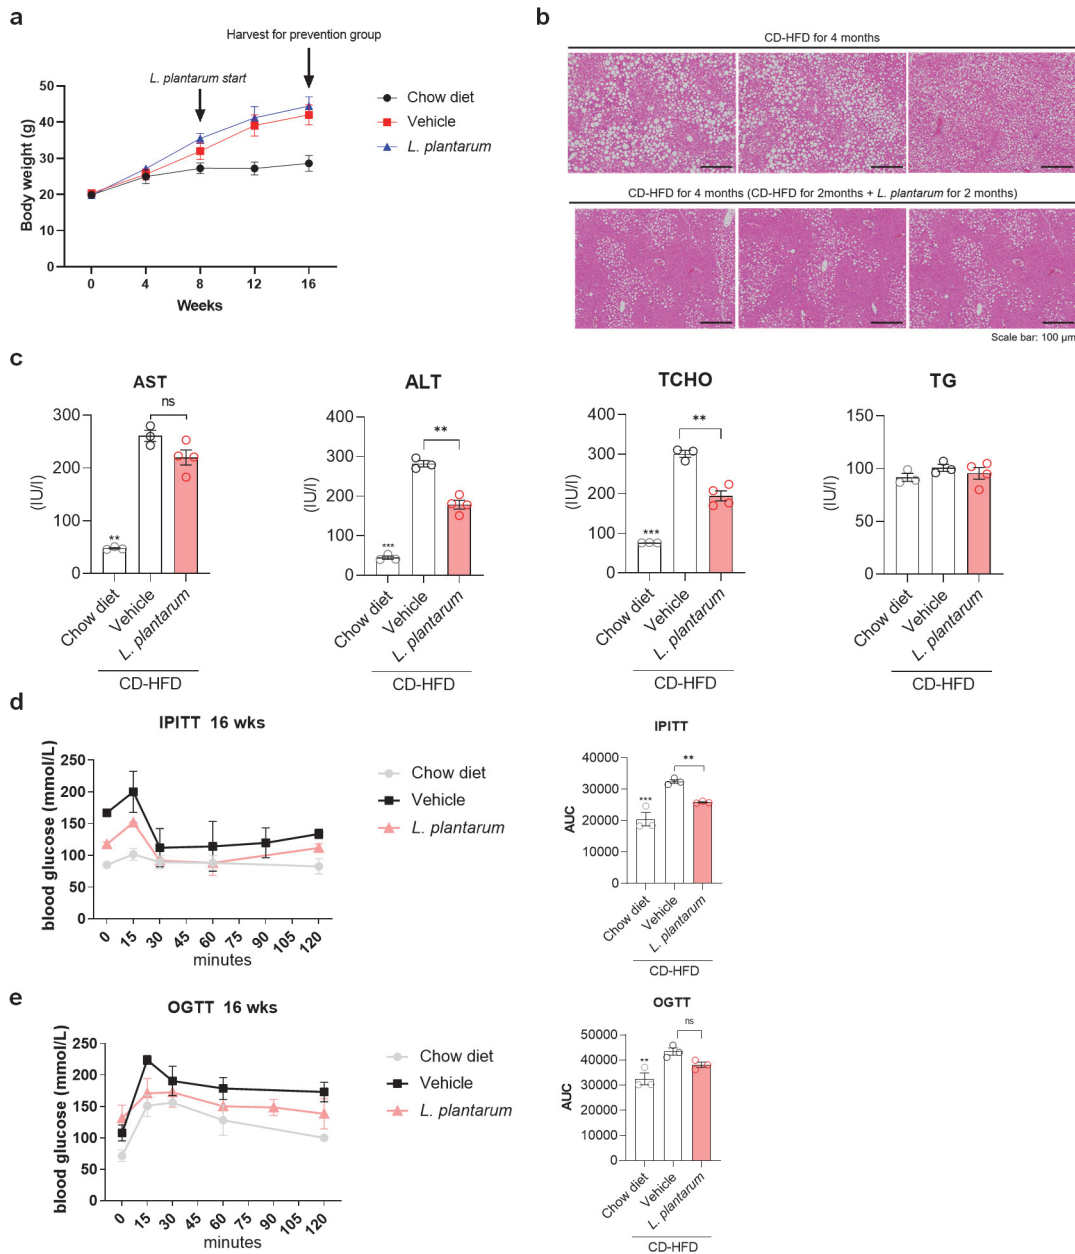

**Supplementary Fig. 7. Effect of *L. plantarum* on NAFL murine models.** (a) Body weight over time. (b) Representative microphotographs of H&E-stained liver sections. Scale bar = 100  $\mu$ m. (c) Serum biochemistry levels. (d, e) Comparing OGTT and IPITT at 16 weeks, mice were subsequently fed with CD-HFD for eight weeks and administered *L. plantarum* for eight weeks. \* $P < 0.05$ , \*\*  $P < 0.01$  compared with the CD-HFD vehicle-treated group, using the posthoc Tukey test after ANOVA. CD-HFD, choline-deficient high fat diet; AST, aspartate aminotransferase; ALT, alanine aminotransferase; TCHO, total cholesterol; TG, triglyceride; IPITT, intraperitoneal insulin tolerance test; OGTT, oral glucose tolerance test.

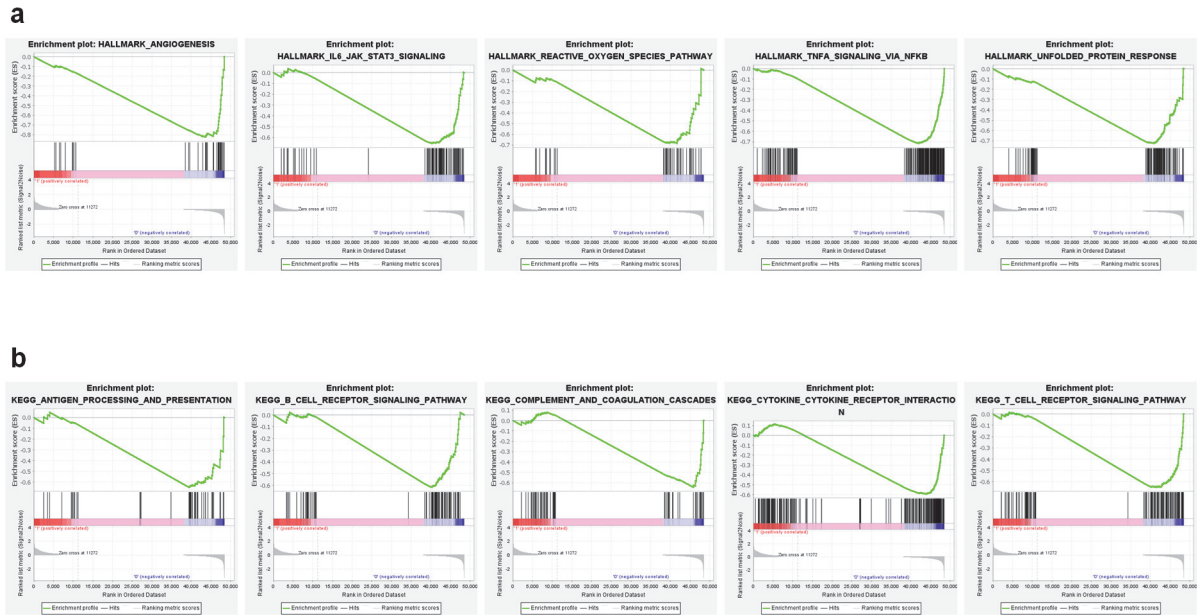

**Supplementary Fig. 8. GSEA enrichment plots for the top enriched category in L-arginine treatment related to Figure 6. (a, b) Inflammation-related terms in L-arginine treated group compared with the vehicle group. Based on the Hallmark (a) and the KEGG pathway (b).**

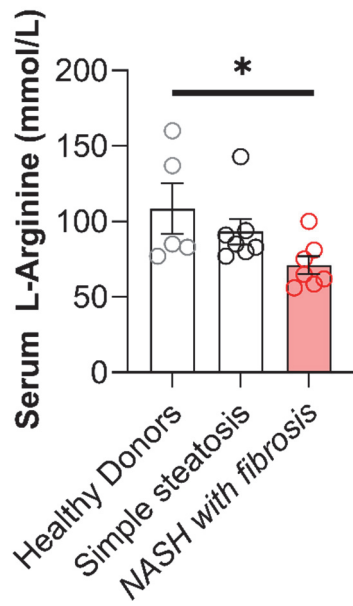

**Supplementary Fig. 9. Levels of L-arginine across various stages of NAFLD in human NAFLD. L-arginine levels decreased as NAFLD progressed.**

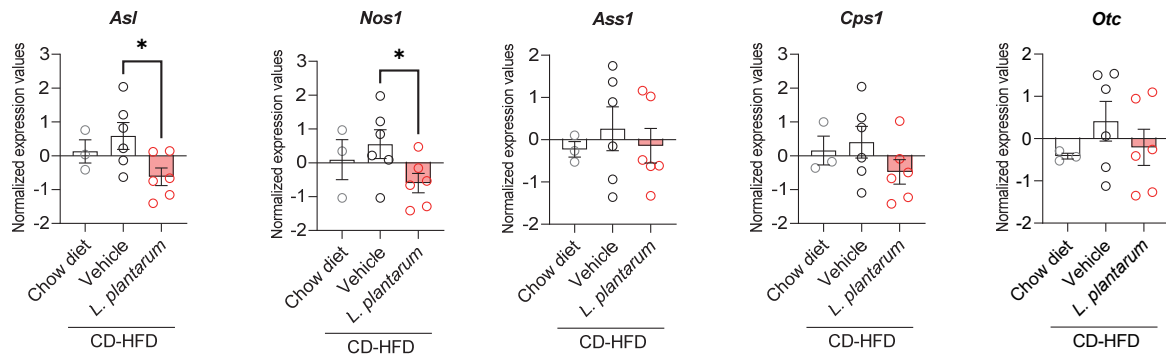

**Supplementary Fig. 10. Relative mRNA levels of genes related to L-arginine biosynthesis in liver transcriptomic data.**

## SUPPLEMENTARY TABLES

### Supplementary Table 1. List of antibodies used for Immunohistochemistry analysis and

#### Western blot assay

| <i>Name</i>           | <i>Supplier</i>           | <i>Cat no.</i> |
|-----------------------|---------------------------|----------------|
| F4/80                 | Invitrogen                | Cat# MA5-16363 |
| Myeloperoxidase (MPO) | Invitrogen                | Cat# PA5-16672 |
| E-cadherin            | Cell Signaling Technology | Cat# 3195      |
| Occludin              | Novus                     | Cat# 87402     |
| HNF-4alpha            | Santa Cruz Biotechnology  | Cat# sc-374229 |
| Albumin               | R & D systems             | Cat# MAP-1455  |
| $\beta$ -Actin        | Abcam                     | Cat# ab20272   |

**Supplementary Table 2. Primers used for real-time PCR in this study**

| <i>Gene</i>     | <i>Species</i> | <i>Sequence (5'-3')</i>     |
|-----------------|----------------|-----------------------------|
| IL-1 $\beta$ _F | Mouse          | CCAGCTTCAAATCTCACAGCAG      |
| IL-1 $\beta$ _R | Mouse          | CTTCTTTGGGTATTGCTTGGGATC    |
| IL-12_F         | Mouse          | GAGCACTCCCCATTCTACT         |
| IL-12_R         | Mouse          | GCATTGGACTTCGGTAGATG        |
| GAPDH_F         | Mouse          | ACTCCACTCACGGCAAATTC        |
| GAPDH_R         | Mouse          | TCTCCATGGTGGTGAAGACA        |
| Srebf1_F        | Mouse          | TGA CCC GGC TAT TCC GTG A   |
| Srebf1_R        | Mouse          | CTG GGC TGA GCA ATA CAG TTC |
| Fasn_F          | Mouse          | GCG GGT TCG TGA AAC TGA TAA |
| Fasn_R          | Mouse          | GCA AAA TGG GCC TCC TTG ATA |
| Acaca_F         | Mouse          | CAG TAA CCT GGT GAA GCT GGA |
| Acaca_R         | Mouse          | GCC AGA CAT GCT GGA TCT CAT |
| Pparg_F         | Mouse          | GGT GTG ATC TTA ACT GCC GGA |
| Pparg_R         | Mouse          | GCC CAA ACC TGA TGG CAT TG  |
| Gpam_F          | Mouse          | CCA CAG AGC TGG GAA AGG TT  |
| Gpam_R          | Mouse          | GTG CCT TGT GTG CGT TTC AT  |
| Cav3_F          | Mouse          | AGC CGC GTC TAC TCC ATC TA  |
| Cav3_R          | Mouse          | TCT CTT TCT GCG TGC TGA TG  |
| CD36_F          | Mouse          | GCA AAG AAG GAA AGC CTG TG  |
| CD36_R          | Mouse          | CCA ATG GTC CCA GTC TCA TT  |
| Fabp1_F         | Mouse          | CAT CCA GAA AGG GAA GGA CA  |
| Fabp1_R         | Mouse          | CCC AGT CAT GGT CTC CAG TT  |
| Slc27a5_F       | Mouse          | TCG GAT CTG GGA ATT CTA CG  |
| Slc27a5_R       | Mouse          | CAG GAA TGC AAA AAC CCT GT  |
| Acox1_F         | Mouse          | CAC GGC TAT TCT CAC AGC AG  |
| Acox1_R         | Mouse          | CAG GCT GTT AAT GTC CAC CA  |
| PPara_F         | Mouse          | ACG ATG CTG TCC TCC TTG ATG |
| Ppara_R         | Mouse          | GTG TGA TAA AGC CAT TGC CGT |

|                |       |                               |
|----------------|-------|-------------------------------|
| <b>Acat1_F</b> | Mouse | CCC CAT TGA TTT TCC ACT TG    |
| <b>Acat1_R</b> | Mouse | AGC ACA ACC ACA CTG AAT GC    |
| <b>Cpt1a_F</b> | Mouse | CCT GCA TTC CTT CCC ATT TG    |
| <b>Cpt1a_R</b> | Mouse | TGC CCA TGT CCT TGT AAT GTG   |
| <b>Mttp_F</b>  | Mouse | GAA AGA AGT GCT CCC TCA G     |
| <b>Mttp_R</b>  | Mouse | CCT TTG AAC TTA CTA AGG AGG G |
| <b>ApoB_F</b>  | Mouse | TAC TTC CAC CCA CAG TCC CCT   |
| <b>ApoB_R</b>  | Mouse | CCT TAG AAG CCT TGG GCA CAT   |

**Supplementary Table 3. Basic characteristics of the participants in the human liver transcriptomic cohort**

| <i>Clinical features</i>                  | <i>NAFLD<br/>(n = 28)</i> | <i>Healthy control<br/>(n = 5)</i> |
|-------------------------------------------|---------------------------|------------------------------------|
| Age (year)                                | 43.07 ± 15.06             | 26 ± 5.36                          |
| Sex, male (%)                             | 17 (60.7)                 | 5 (100)                            |
| DM (%)                                    | 11 (39.2)                 | 0                                  |
| Height (cm)                               | 170.46 ± 8.59             | 176.53 ± 6.49                      |
| Weight (cm)                               | 87.46 ± 20.42             | 79.12 ± 10.82                      |
| BMI (kg/m <sup>2</sup> )                  | 29.82 ± 5.21              | 25.31 ± 2.49                       |
| AST (U/L)                                 | 76.16 ± 30.61             | 16.12 ± 3.79                       |
| ALT (U/L)                                 | 91.25 ± 53.59             | 15.22 ± 3.65                       |
| γ-GTP (U/L)                               | 139.03 ± 79.61            | 20.23 ± 3.96                       |
| Total cholesterol (mg/dL)                 | 188.21 ± 40.01            | 181.21 ± 38.85                     |
| Triglyceride (mg/dL)                      | 195.35 ± 96.24            | 97.80 ± 25.21                      |
| HDL-cholesterol (mg/dL)                   | 43.33 ± 7.52              | 42.80 ± 9.94                       |
| LDL-cholesterol (mg/dL)                   | 127.40 ± 39.57            | 98.73 ± 43.63                      |
| <b><i>Liver Histology</i><sup>†</sup></b> |                           |                                    |
| Steatosis                                 | 1.85 (1-3)                | NA                                 |
| Inflammation                              | 1.57 (1-3)                | NA                                 |
| Ballooning                                | 1.25 (0-2)                | NA                                 |
| NAFLD Activity Score                      | 4.67 (2-7)                | NA                                 |

**Notes:** Data are expressed as number (%) or mean ± standard deviation. <sup>†</sup>Values for liver histology are expressed as mean (min-max).

Abbreviations: DM, diabetes mellitus; BMI, body mass index; AST, aspartate aminotransferase; ALT, alanine aminotransferase; γ-GTP, γ-glutamyl transferase; HDL, high-density lipoprotein; LDL, low density lipoprotein; NA, not applicable.



**Supplementary Table 4. Relative abundance of bacterial composition estimated by genome-based profiling using shotgun sequencing data**

| <i>Species</i>                             | <i>Chow diet</i> | <i>Vehicle group</i> | <i>L. plantarum group</i> |
|--------------------------------------------|------------------|----------------------|---------------------------|
| <i>Faecalibaculum_rodentium</i>            | 35.47243         | 0.635758             | 4.894642                  |
| <i>Muribaculaceae_bacterium_DSM_103720</i> | 14.60647         | 1.879778             | 0.596436                  |
| <i>Bacteroides_vulgatus</i>                | 14.26879         | 56.24696             | 20.85911                  |
| <i>Muribaculum_intestinale</i>             | 13.58573         | 0.095878             | 1.900638                  |
| <i>Lactobacillus_intestinalis</i>          | 3.820192         | 0.253843             | 0                         |
| <i>Bacteroides_caccae</i>                  | 3.278392         | 3.728053             | 1.567714                  |
| <i>Lactobacillus_reuteri</i>               | 3.204472         | 0.38465              | 0                         |
| <i>Bifidobacterium_pseudolongum</i>        | 2.450714         | 5.072518             | 0.398562                  |
| <i>Lactobacillus_murinus</i>               | 1.977508         | 1.759658             | 3.247004                  |
| <i>Mucispirillum_schaedleri</i>            | 1.777474         | 3.83332              | 29.54553                  |
| <i>Enterorhabdus_caecimuris</i>            | 1.382062         | 0.59501              | 0.609636                  |
| <i>Parabacteroides_goldsteinii</i>         | 1.183696         | 3.83323              | 6.924694                  |
| <i>Anaerotruncus_sp_G3_2012</i>            | 0.883488         | 1.218993             | 1.156412                  |
| <i>Lachnospiraceae_bacterium_28_4</i>      | 0.432074         | 1.361583             | 8.261528                  |
| <i>Lactobacillus_johnsonii</i>             | 0.329346         | 0.41756              | 0.625662                  |
| <i>Clostridium_sp_ASF502</i>               | 0.23002          | 0.158865             | 0.361566                  |
| <i>Akkermansia_muciniphila</i>             | 0.207396         | 12.42145             | 4.322594                  |
| <i>Adlercreutzia_equolifaciens</i>         | 0.159166         | 0.011948             | 0.01259                   |
| <i>Dorea_sp_5_2</i>                        | 0.154344         | 0.015433             | 0.108972                  |
| <i>Lachnospiraceae_bacterium_A4</i>        | 0.141234         | 0.34071              | 0                         |
| <i>Lachnospiraceae_bacterium_A2</i>        | 0.111222         | 0.99498              | 0.002626                  |
| <i>Lachnospiraceae_bacterium_COE1</i>      | 0.086364         | 0                    | 0                         |
| <i>Asaccharobacter_celatus</i>             | 0.05564          | 0.004845             | 0.004928                  |
| <i>Firmicutes_bacterium_ASF500</i>         | 0.051598         | 0.109635             | 0.009174                  |
| <i>Oscillibacter_sp_1_3</i>                | 0.04001          | 0.113228             | 0.093656                  |
| <i>Acutalibacter_muris</i>                 | 0.03684          | 0.071655             | 0.071282                  |
| <i>Clostridium_sp_ASF356</i>               | 0.029736         | 0                    | 0                         |
| <i>Lachnospiraceae_bacterium_3_1</i>       | 0.021034         | 0.005305             | 0.002918                  |
| <i>Lachnospiraceae_bacterium_M18_1</i>     | 0.014164         | 0.003703             | 0.027728                  |
| <i>Lachnospiraceae_bacterium_10_1</i>      | 0.00416          | 1.653088             | 0.028392                  |
| <i>Escherichia_coli</i>                    | 0.003472         | 0.003335             | 0.30838                   |
| <i>Clostridium_cocleatum</i>               | 0.000544         | 0.374628             | 0                         |
| <i>Eubacterium_plexicaudatum</i>           | 0.000126         | 0.000393             | 0.028072                  |
| <i>Eubacterium_sp_14_2</i>                 | 0.000102         | 0.021123             | 0.013282                  |
| <i>Bacteroides_caecimuris</i>              | 0                | 0                    | 0.980864                  |
| <i>Bacteroides_sartorii</i>                | 0                | 0                    | 0.031734                  |
| <i>Bacteroides_uniformis</i>               | 0                | 0                    | 0.085286                  |
| <i>Prevotella_sp_MGM1</i>                  | 0                | 0.01246              | 0                         |
| <i>Prevotella_sp_MGM2</i>                  | 0                | 0                    | 1.10701                   |
| <i>Parabacteroides_distasonis</i>          | 0                | 0.070713             | 0.392228                  |
| <i>Parabacteroides_merdae</i>              | 0                | 0                    | 0.001358                  |
| <i>Staphylococcus_aureus</i>               | 0                | 0                    | 0.008852                  |
| <i>Staphylococcus_sciuri</i>               | 0                | 0.000253             | 0.008886                  |
| <i>Enterococcus_faecalis</i>               | 0                | 0.00489              | 0.288056                  |
| <i>Lactobacillus_plantarum</i>             | 0                | 0.018343             | 9.655816                  |
| <i>Lactococcus_lactis</i>                  | 0                | 1.660193             | 0.85178                   |
| <i>Acetatifactor_muris</i>                 | 0                | 0.169973             | 0.074428                  |
| <i>Lachnospiraceae_bacterium_3_2</i>       | 0                | 0.271855             | 0.19921                   |
| <i>Romboutsia_ilealis</i>                  | 0                | 0.116015             | 0.104724                  |

|                                        |   |          |          |
|----------------------------------------|---|----------|----------|
| <i>Anaerotruncus_colihominis</i>       | 0 | 0.001098 | 0.005262 |
| <i>Ruthenibacterium_lactatiformans</i> | 0 | 0.00275  | 0        |
| <i>Ileibacterium_valens</i>            | 0 | 0.033863 | 0.021378 |
| <i>Proteus_hauseri</i>                 | 0 | 0.016508 | 0.070356 |
| <i>Proteus_penneri</i>                 | 0 | 0        | 0.129058 |

---
